# Supplementary material for: 2D amorphous MoS3 nanosheets with porous network structures for scavenging toxic metal ions from synthetic acid mine drainage
Source: Royal Society of Chemistry journal article supplement (doi:10.1039/c9ta05861c), 2019-01-01
Supplement: c9ta05861c1.pdf [file c9ta05861c1.pdf]

## Supporting Information

### **Amorphous 2D MoS<sub>3</sub> Nanosheets with Porous Structures for Scavenging Toxic Metal Ions from Synthetic Acid Mine Drainage**

Weng Fu<sup>a</sup>, Siyuan Yang<sup>a,b</sup>, Hong Yang<sup>c</sup>, Bao Guo<sup>d</sup>, Zhiqiang Huang<sup>e</sup>

<sup>a</sup> The University of Queensland, School of Chemical Engineering, St Lucia, 4072 QLD, Australia

<sup>b</sup> School of Resources and Environmental Engineering, Wuhan University of Technology, Wuhan, Hubei 430070, China

<sup>c</sup> School of Environmental Science and Spatial Informatics, China University of Mining and Technology, Xuzhou, Jiangsu 21116, P.R.China

<sup>d</sup> School of Zijin Mining, Fuzhou University, Fuzhou 350116, Fujian, China

<sup>e</sup> Jiangxi University of Science and Technology, School of Resources and Environmental Engineering, Ganzhou, 341000, PR China

Corresponding author E-mail: [w.fu1@uq.edu.au](mailto:w.fu1@uq.edu.au) (W. Fu); [zhiqiang@jxust.edu.cn](mailto:zhiqiang@jxust.edu.cn) (Z. Huang)

# 1. Experimental

## 1.1 Chemicals and Reagents

Ammonium tetrathiomolybdate ((NH<sub>4</sub>)<sub>2</sub>MoS<sub>4</sub>) and dimethylformamide (DMF) were purchased from Sigma Aldrich. Absolute ethanol, concentrated HCl solution (32.5 wt%), nitric acid, sodium hydroxide, metal nitrate salts were analytical grade obtained from local chemical companies.

## 1.2 Preparation of amorphous 2D MoS<sub>3</sub> nanosheets

0.1 mol/L (NH<sub>4</sub>)<sub>2</sub>MoS<sub>4</sub> were solution (1000 mL) was prepared by dissolving (NH<sub>4</sub>)<sub>2</sub>MoS<sub>4</sub> solids in a conical flask under N<sub>2</sub> protection. The (NH<sub>4</sub>)<sub>2</sub>MoS<sub>4</sub> solution was magnetically stirred, when 5 M HCl solution was added slowly until the solution pH reached 1.0. During the reaction, amorphous MoS<sub>3</sub> were formed as dark precipitate and there was H<sub>2</sub>S gas generated as well. Then, the resulting dark precipitate was filtered, and washed with DI water until solution pH became 6.0-7.0. Absolute ethanol and carbon disulfide were used to wash the precipitate sequentially.

Amorphous 2D MoS<sub>3</sub> nanosheets were prepared by liquid exfoliation. Typically, 0.1 g of amorphous MoS<sub>3</sub> was mixed with 100 mL of DMF under ultrasonic radiation with the power of 40 kHz and 200W for 5 h. Then, the suspended mixture was centrifuged at 1000 rpm for 10 min to remove the bulk MoS<sub>3</sub>. The obtained amorphous 2D MoS<sub>3</sub> nanosheets were dried in a freeze dryer at -65°C overnight.

## 1.3 Sample Characterization

The shape and morphology of amorphous 2D MoS<sub>3</sub> nanosheets was tested by FE-SEM (MLA650F) and TEM (JEOL-2100). Energy Dispersive Spectroscopy (EDS) Analysis were performed by Oxford 50mm<sup>2</sup> X-Max SDD x-ray detector. Powder XRD equipment (Bruker D8) was used to characterize the crystallinity of amorphous 2D MoS<sub>3</sub> nanosheets at a scan rate of 2°C/min. XPS spectra of samples before and after metal uptake were obtained by Thermo XPS spectrometer. Brunauer-Emmett-Teller (BET) surface area and pore volume were measured at 77 K by nitrogen sorption using a Micromeritics ASAP 3000 instrument. The pore size distribution was calculated using the BJH method. Raman spectra of samples before and after metal adsorption process were collected by raman microscope

(Renishaw). Inductively coupled plasma optical emission spectroscopy (ICP-OES, PerkinElmer) was used to test metal concentration in solution. Ex-situ AFM observations were made by tapping mode using a Veeco Multimode (IVa) Scanning Probe Microscope.

#### 1.4 Adsorption Tests

The effects of solution pH, metal concentration and residence time on metal uptakes by amorphous 2D MoS<sub>3</sub> nanosheets were systematically studied under magnetic stirring at 298 K. The solution pH was controlled by concentrated nitric acid and sodium hydroxide solution. After adsorption, the solid residue were filtered by microfiltration PVDF membrane with 0.2 µm pores. The metal concentration in the filtrate were analyzed by ICP-OES.

The uptake capacities of metal ions by amorphous 2D MoS<sub>3</sub> nanosheets was obtained, based on the equation:

$$Q_e = \frac{(C_o - C_f)V}{m} \quad (S-1)$$

where  $C_o$  and  $C_f$  are the initial and final concentrations of metal ions (mg/L).  $V$ (L) is the metal solution volume.  $Q_e$  (mg/g) is adsorption capacity of metal ions.  $m$  (g) denote the mass of the sorbent.

Adsorption distribution constant ( $K_d$ ) is an important parameter for understanding the mobility and distribution of metal ions between aqueous solution and sorbent materials. The equation of  $K_d$  is as follows:

$$K_d = \frac{C_o - C_f}{C_f} \times \frac{V}{m} \quad (S-2)$$

where  $K_d$  (mL/g) is the adsorption distribution constant;  $C_o$  and  $C_f$  (mg/L) are initial and final metal concentration in solution, respectively;  $V$  (mL) is the metal solution volume;  $m$  (g) is the mass of sorbent material used in adsorption process.

The mechanisms of kinetic adsorption were investigated by the pseudo-second-order model.

Pseudo-second-order adsorption equation (S-3):

$$\frac{t}{Q_t} = \frac{1}{k_2 Q_{e,cal}^2} + \frac{t}{Q_{e,cal}} \quad (S-3)$$

where  $Q_e$  (mg/g) and  $Q_t$  (mg/g) are the metal uptake at equilibrium and any time  $t$  (min), respectively;  $Q_{e,cal}$  (mg/g) is the calculated metal uptake;  $t$  is the shaken time (min);  $k_2$  (g/mg/min) are the equilibrium rate constant of the second-order sorption respectively.

The Langmuir method in Eq(S-4) were used to model the adsorption isotherm:

$$\frac{C_e}{Q_e} = \frac{C_e}{Q_{max}} + \frac{1}{k_L \cdot Q_{max}} \quad (S-4)$$

where  $C_e$  (mg/L) is the equilibrium concentration,  $Q_e$  (mg/g) is the amount of metal ions adsorbed at equilibrium,  $Q_{max}$  (mg/g) is the maximum amount of adsorbed metals.  $k_L$  (L/mg) the constant corresponding to the adsorption energy.

### 1.5 Recycling Tests

Recycling performance of amorphous 2D MoS<sub>3</sub> nanosheets was investigated by 4 consecutive adsorption-stripping cycles. The adsorption conditions in each cycle are as follow: pH=2, synthetic acid mine drainage solution (400 mg/L Al, 900 mg/L Fe, 300 mg/L Mg, 100 mg/L Ca, 105 mg/L Cu, 125 mg/L Cd, 50 mg/L Hg and ~5200 mg/L SO<sub>4</sub><sup>2-</sup>), T = 298 K, and time =40 min. For stripping, the spent amorphous 2D MoS<sub>3</sub> nanosheets loaded with heavy metals were treated by a mixture solution of 1M thiourea and 1M HCl for 1 hour to strip the adsorbed metal ions, then washed with DI water for the next adsorption cycle.

## 2. Results

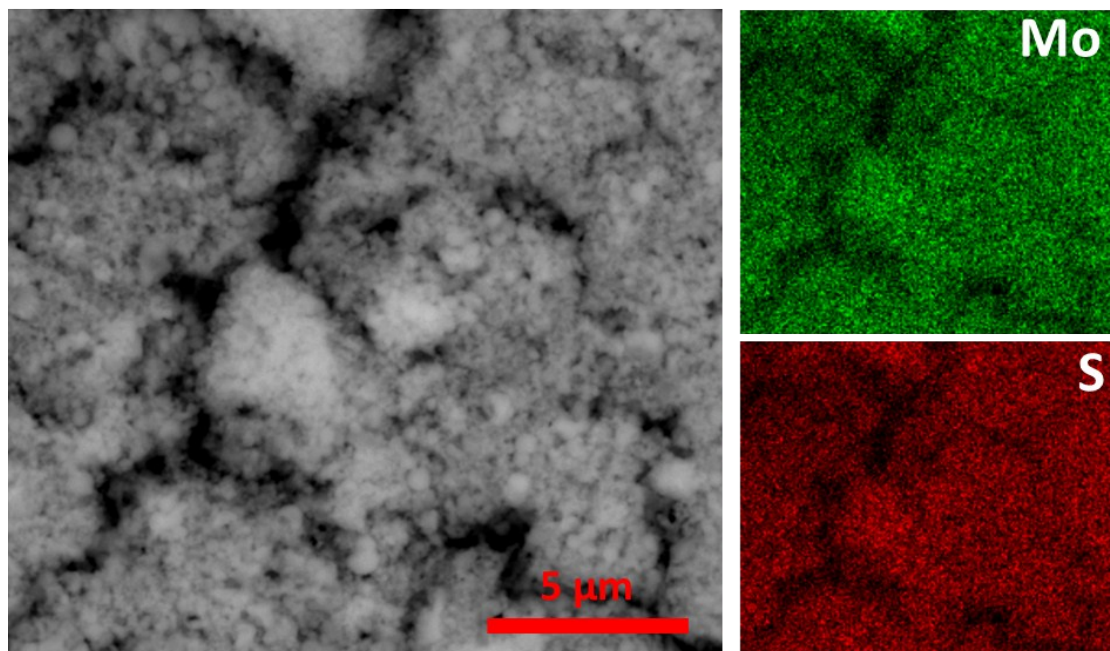

Figure S1. SEM and EDS mapping images of the prepared bulk  $\alpha$ -MoS<sub>3</sub> materials before exfoliation.

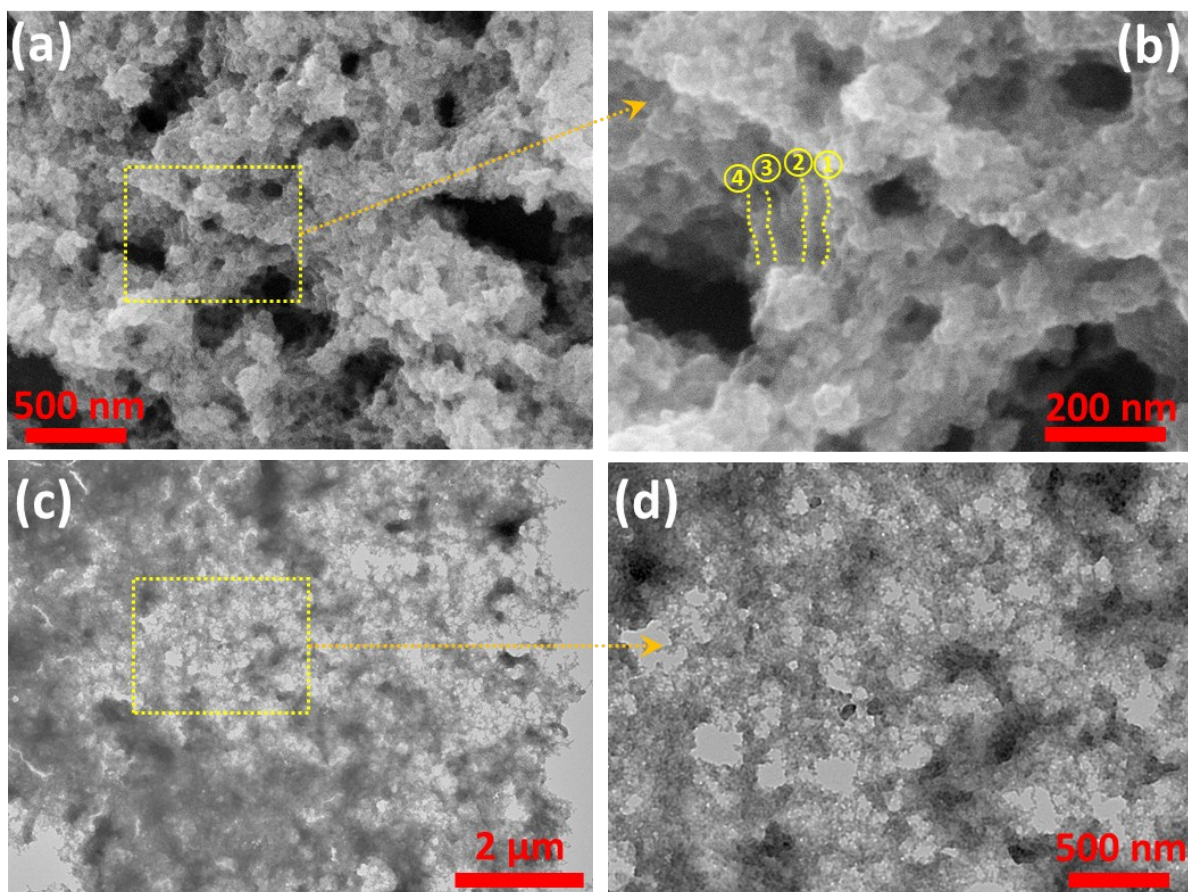

Figure S2. (a) FE-SEM images of prepared  $\alpha$ -MoS<sub>3</sub> materials before exfoliation; (b) The enlarged image of the rectangle area in (a). Yellow dotted lines (①②③④) in (b) suggest the  $\alpha$ -MoS<sub>3</sub> materials exhibits layer-by-layer stacks. (c, d) TEM images of physical aggregate of exfoliated 2D  $\alpha$ -MoS<sub>3</sub> nanosheets.

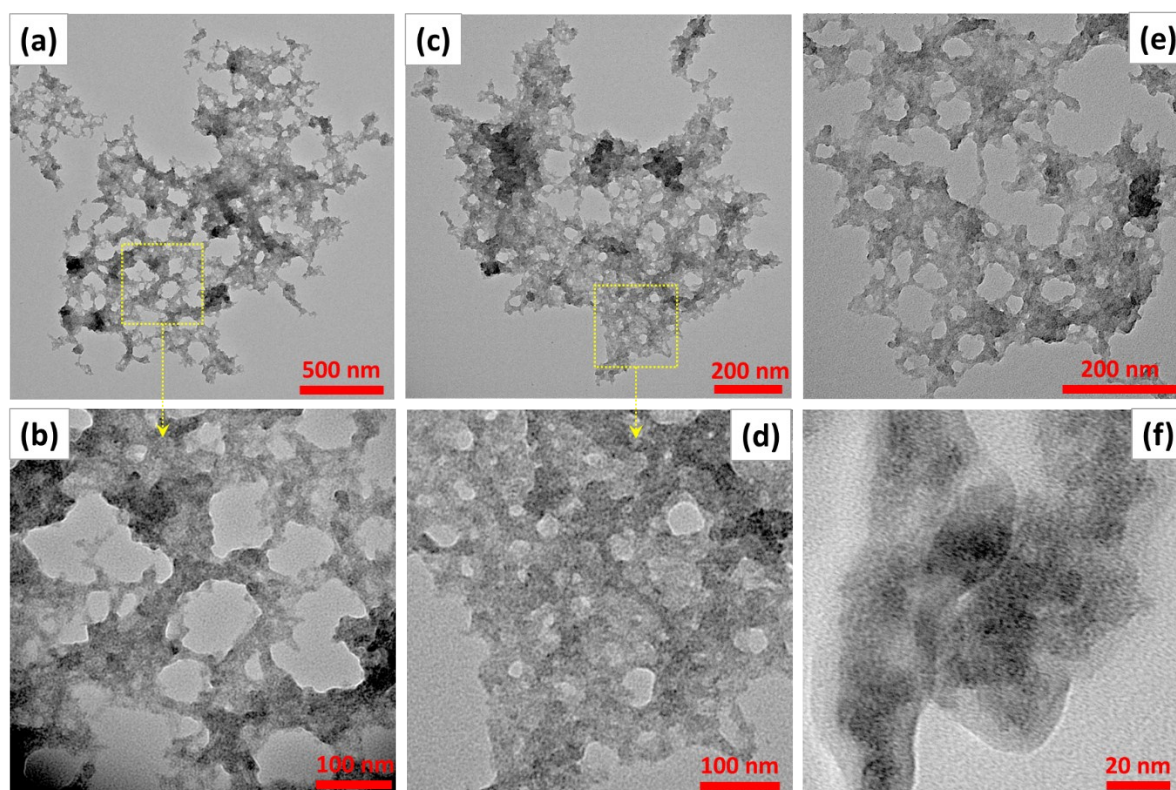

Figure S3. Extra TEM images of exfoliated 2D  $\alpha$ -MoS<sub>3</sub> nanosheets with the porous structures. Enlarged images (b) and (d) are originally from the yellow rectangles in (a) and (c), respectively. High-resolution image (f) is the amorphous structure of 2D  $\alpha$ -MoS<sub>3</sub> nanosheets.

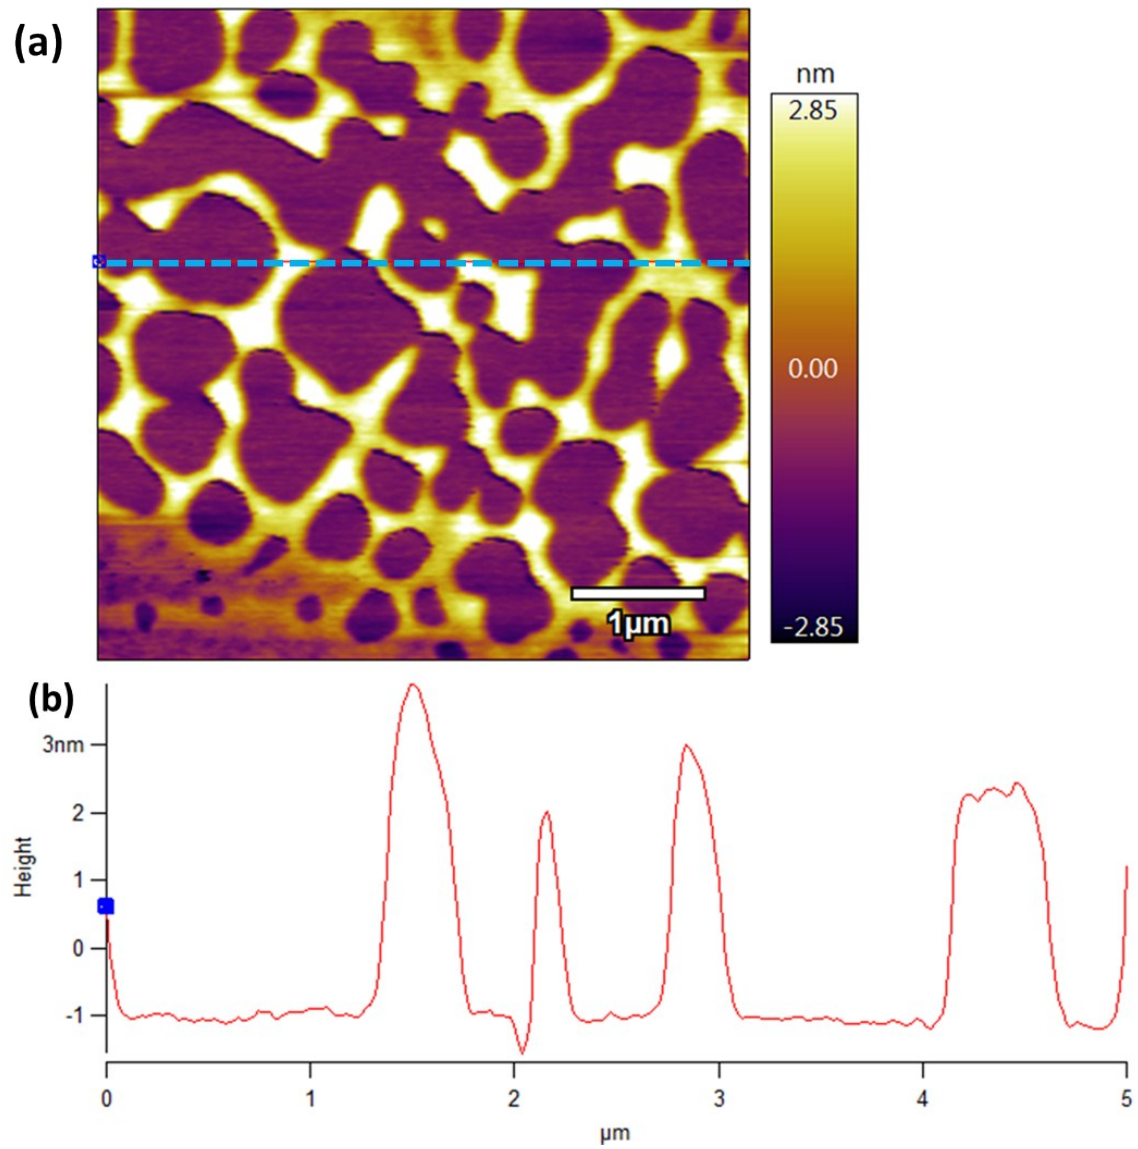

Figure S4. (a) AFM height image of exfoliated 2D  $\alpha$ -MoS<sub>3</sub> nanosheets with the porous structures; (b) Height profiles along the blue dotted lines in image (a).

Table S1. Rate constants for the pseudo-second-order models of Cu(II), Cd(II) and Hg(II) ions on amorphous 2D MoS<sub>3</sub> nanosheets (include m/V = 0.25 mg/mL, T = 298 K).

| Metal concentration and Solution pH | Metal ions | Pseudo-second-order |                     |        |
|-------------------------------------|------------|---------------------|---------------------|--------|
|                                     |            | $Q_{e,cal}$<br>mg/g | $k_2$<br>(g/mg/min) | $R^2$  |
| $C_0=50$ mg/L<br>pH=2               | Cu(II)     | 53.48               | 0.001387            | 0.9939 |
|                                     | Cd (II)    | 80                  | 0.001284            | 0.9952 |
|                                     | Hg (II)    | 200                 | 0.011364            | 1.000  |
| $C_0=50$ mg/L<br>pH=6               | Cu(II)     | 200                 | 0.006188            | 1.000  |
|                                     | Pb (II)    | 200                 | 0.011628            | 1.000  |
|                                     | Hg (II)    | 200                 | 0.1000              | 1.000  |

Table S2. Constants for the Langmuir isotherms of Cu(II), Cd(II) and Hg(II) ions on amorphous 2D MoS<sub>3</sub> nanosheets (include m/V = 0.25 mg/mL, T = 298 K).

| Metal ions and Solution pH | Langmuir Isotherm |              |        |
|----------------------------|-------------------|--------------|--------|
|                            | $Q_{max}$ (mg/g)  | $k_L$ (L/mg) | $R^2$  |
| Cu(II) pH=2                | 81.6994           | 0.04509      | 0.9985 |
| Cd(II) pH=2                | 118.7648          | 0.05803      | 0.9978 |
| Hg(II) pH=2                | 990.1000          | 0.1187       | 0.9970 |
| Cu(II) pH=6                | 236.9668          | 1.0933       | 0.9999 |
| Cd(II) pH=6                | 383.1418          | 0.2155       | 0.9958 |
| Hg(II) pH=6                | 1851.8500         | 0.1151       | 0.9964 |

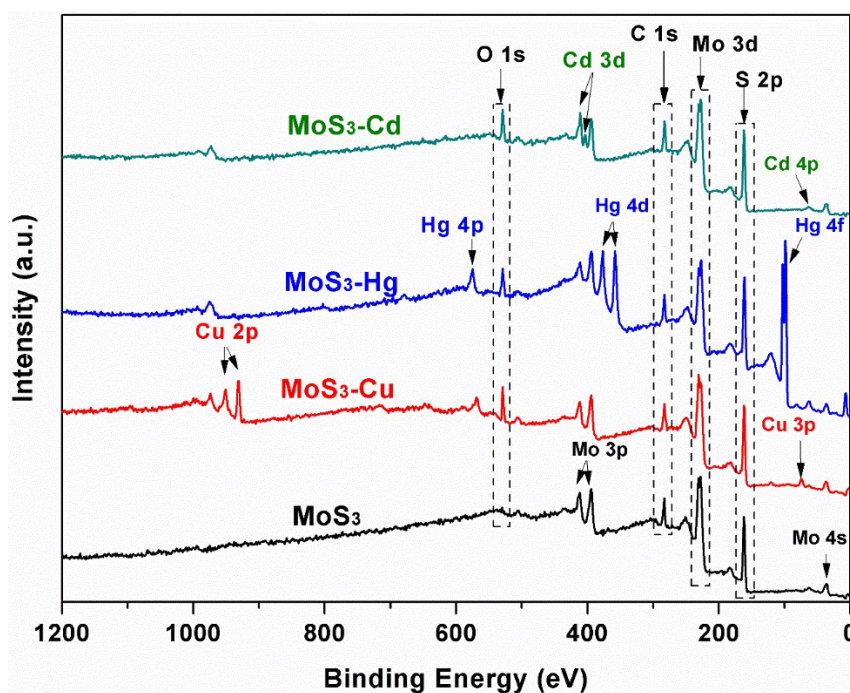

Figure S5. XPS survey scan spectra of 2D amorphous MoS<sub>3</sub> nanosheets and metal-loaded MoS<sub>3</sub> nanosheets.

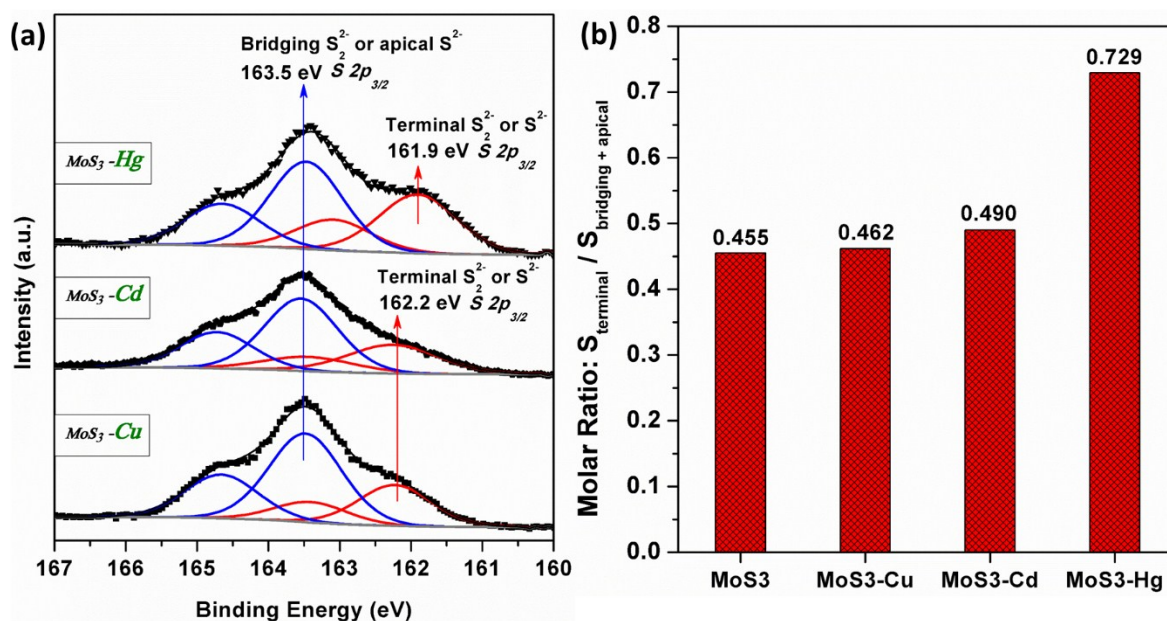

Figure S6. (a) High resolution XPS spectra of S 2p for metal-loaded MoS<sub>3</sub> nanosheets. (b) The molar ratio of  $S_{\text{terminal}} / S_{\text{bridging + apical}}$  for both 2D  $\alpha$ -MoS<sub>3</sub> nanosheets and metal-loaded MoS<sub>3</sub> nanosheets, based on the area ratio between terminal sulphur and bridging + apical sulphur in Figure 2(d) and Figure S3(a).

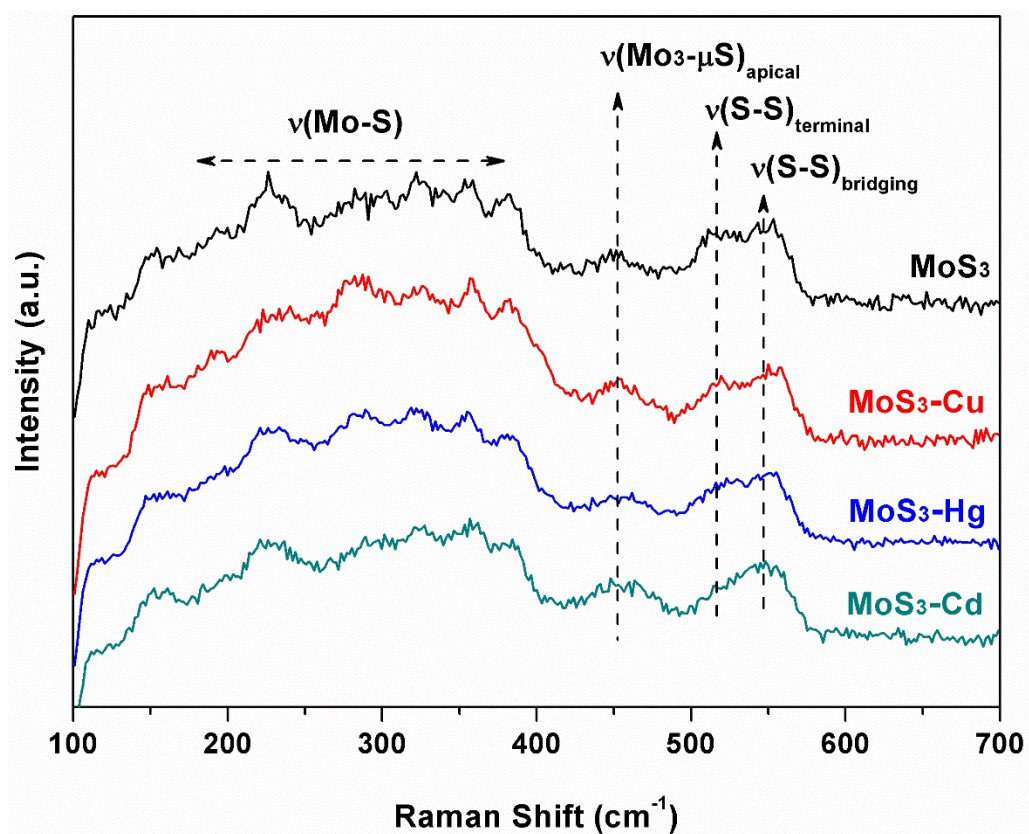

Figure S7. Raman spectra of 2D amorphous MoS<sub>3</sub> nanosheets and metal-loaded MoS<sub>3</sub> nanosheets.

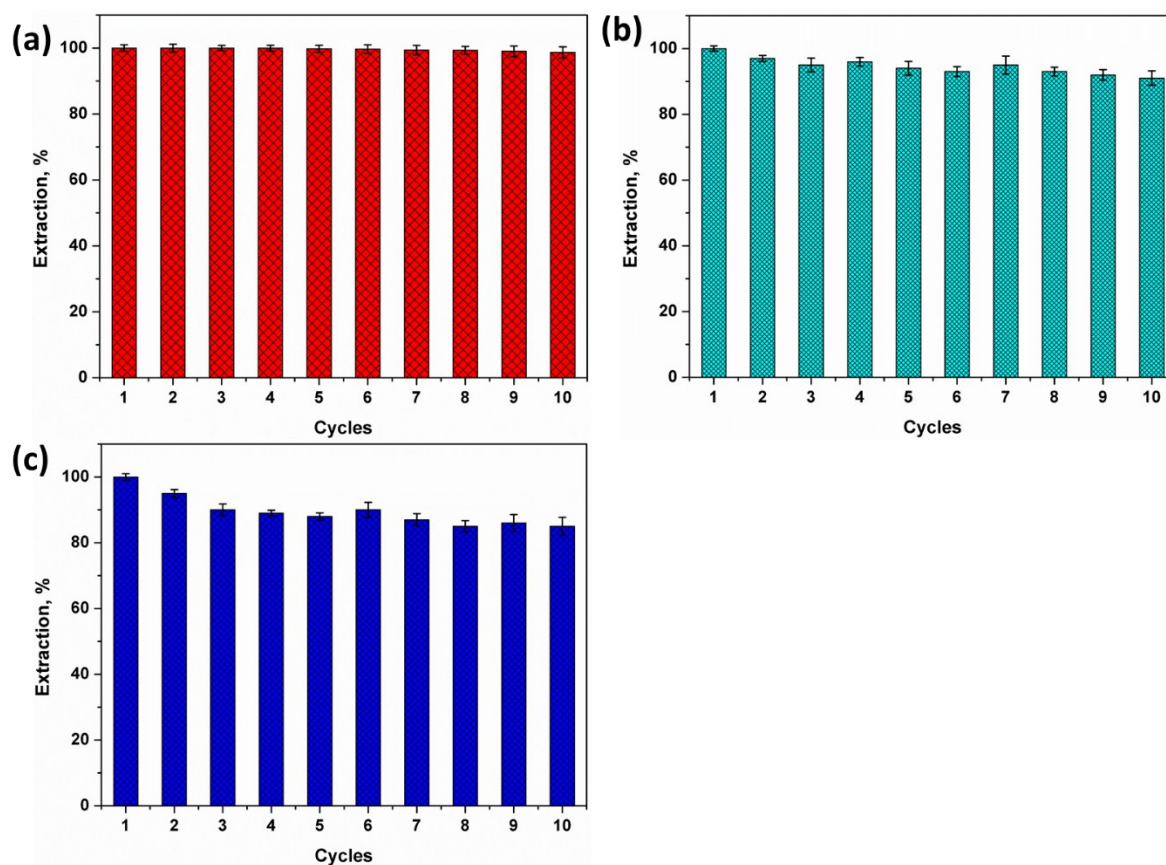

Figure S8. The adsorption and reusability of 2D  $\alpha$ -MoS<sub>3</sub> nanosheets for removing Cu(II), Cd(II) and Hg(II) ions from synthetic acid mine drainage (AMD). (a) Hg(II) removal in 10 consecutive cycles; (b) Cd(II) removal in 10 consecutive cycles; (c) Cu(II) removal in 10 consecutive cycles. The composition of AMD solution includes 400 mg/L Al, 900 mg/L Fe, 300 mg/L Mg, 100 mg/L Ca, 105 mg/L Cu, 125 mg/L Cd, 50 mg/L Hg and  $\sim 5200$  mg/L SO<sub>4</sub><sup>2-</sup> at pH=2. Experimental conditions: m/V = 0.8 mg/mL, temp=25°C and time=40 min.

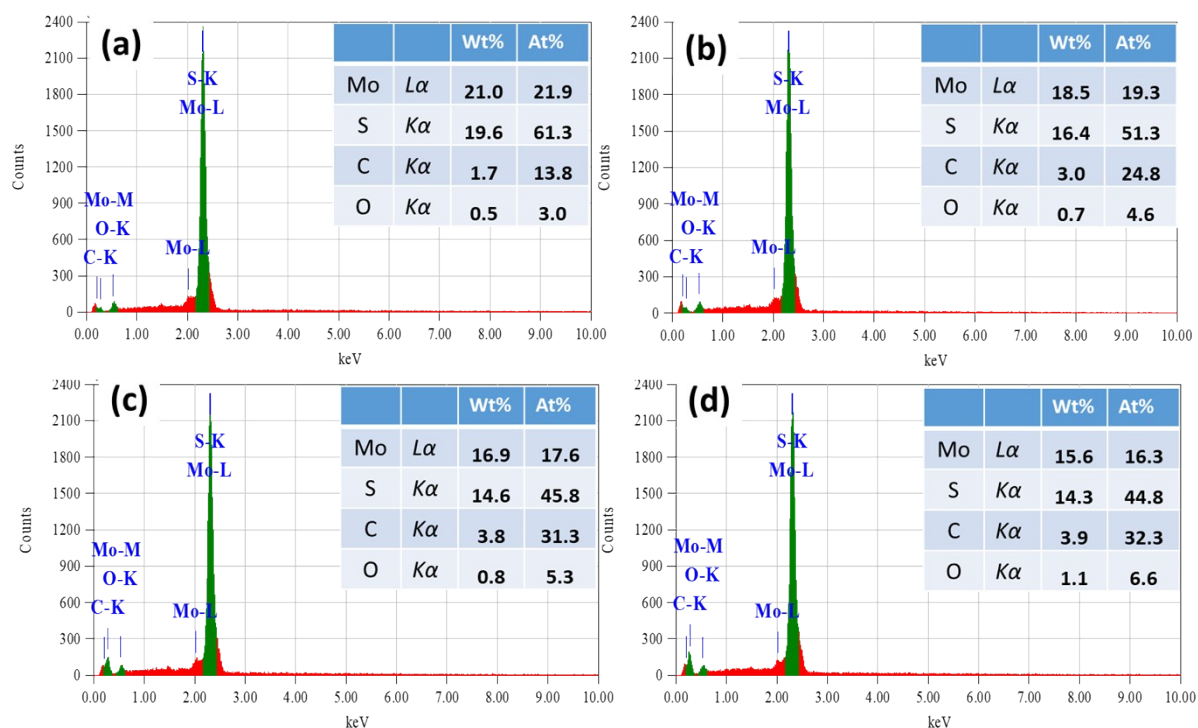

Figure S9. EDS analysis of the chemical stability of 2D amorphous MoS<sub>3</sub> nanosheets under different pHs. (a) newly prepared 2D  $\alpha$ -MoS<sub>3</sub> nanosheets; (b) 2D  $\alpha$ -MoS<sub>3</sub> nanosheets soaked in pH=2 solution for 2 days; (c) 2D  $\alpha$ -MoS<sub>3</sub> nanosheets soaked in pH=4 solution for 2 days; (d) 2D  $\alpha$ -MoS<sub>3</sub> nanosheets soaked in pH=6 solution for 2 days. Temperature for all the tests is 25 °C.
